# Supplementary material
Source: publisher figshare collection journal article supplement (https://acs.figshare.com/ndownloader/files/27369001)
Supplement: Supplementary file 1 [file 27369001]

# Supporting Information

## **Co-existing anammox, ammonium-oxidizing, and nitrite-oxidizing bacteria in biocathode-biofilms enable energy-efficient nitrogen removal in bioelectrochemical desalination process**

*Umesh Ghimire<sup>a</sup>, Veera Ganeswar Gude<sup>a\*</sup> Renotta Smith<sup>b</sup>, John P. Brooks<sup>b</sup>, Dewayne*

*Deng<sup>b</sup>*

<sup>a</sup>Richard A. Rula School of Civil and Environmental Engineering, Mississippi State

University, Mississippi State, MS 39762, United States

<sup>b</sup>USDA-ARS Genetics and Sustainable Agriculture Unit, Mississippi State, MS 39762,

United States

\*Correspondence and requests for materials should be addressed to Gude, V.G. ([gude@cee.msstate.edu](mailto:gude@cee.msstate.edu))

Contents:

Total number of Pages – 7

Total number of Figures – 6

Total number of Tables – 1

(a)

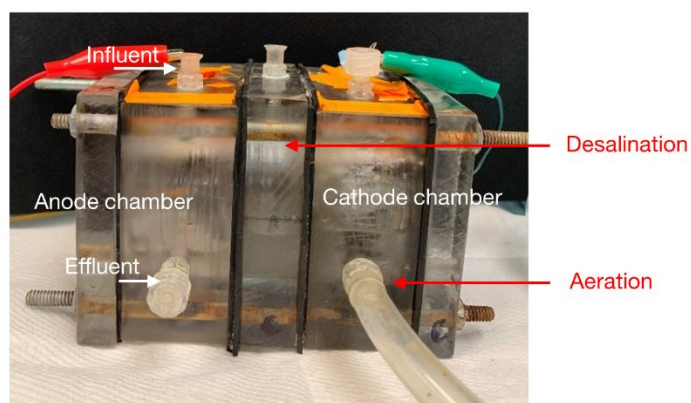

(b)

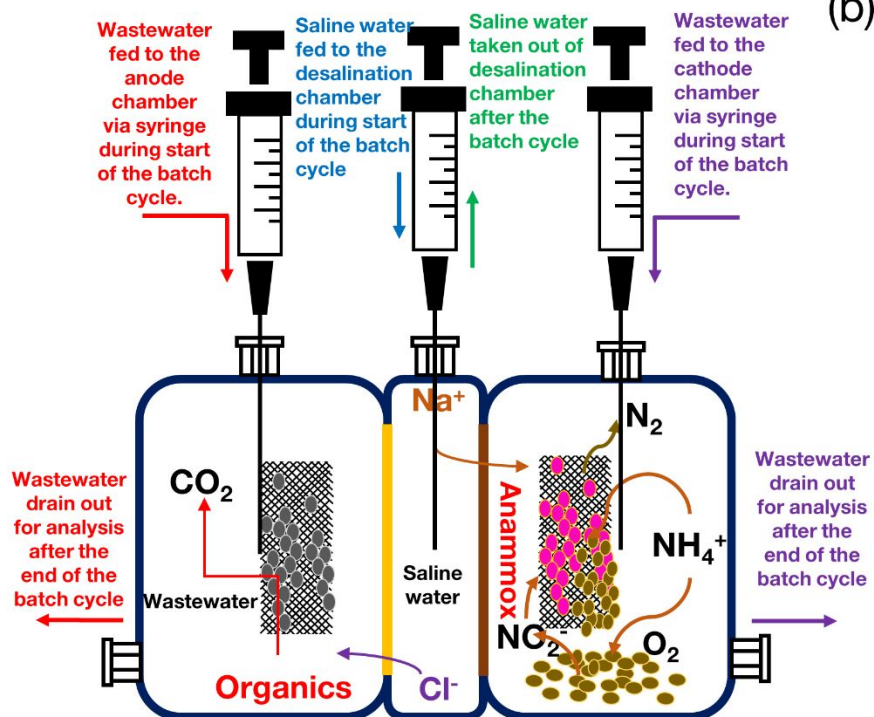

**Figure S1.** Experimental setup of nitritation anammox MDC ( $\text{NiA}_{\text{mox}}$  MDC).

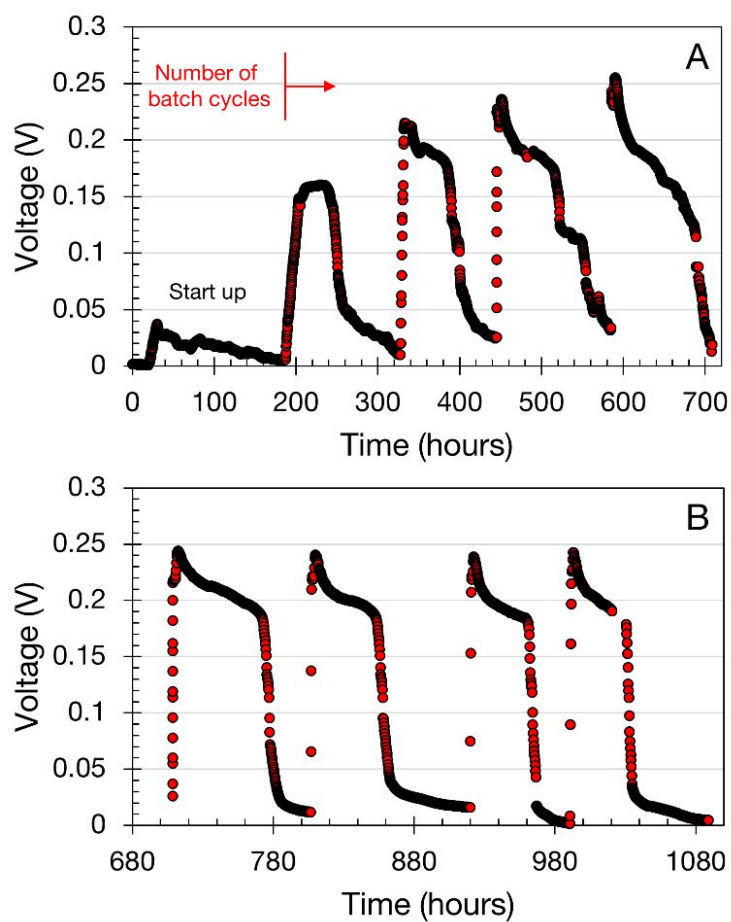

**Figure S2.** Voltage profile generated by  $\text{NiA}_{\text{mox}}$  MDC at  $1000\ \Omega$  resistor during start-up and different operational cycles at air flow rate of 10 ml/min (A), 3 ml/min (B).

**Table S1.** Maximum voltage and power density generated by NiA<sub>max</sub>MDC at different batch cycles at different air flow rate under 1 k $\Omega$  resistor.

A. Air flow rate of 10 ml/min

| MDCs                   | Maximum voltage (mV) |                       |                       |                       |                       | Maximum power density (mW/m <sup>3</sup> ) |                       |                       |                       |                       | Hydraulic retention time (HRT) (hours) |                       |                       |                       |
|------------------------|----------------------|-----------------------|-----------------------|-----------------------|-----------------------|--------------------------------------------|-----------------------|-----------------------|-----------------------|-----------------------|----------------------------------------|-----------------------|-----------------------|-----------------------|
|                        | Start up             | 1 <sup>st</sup> cycle | 2 <sup>nd</sup> cycle | 3 <sup>rd</sup> cycle | 4 <sup>th</sup> cycle | Start up                                   | 1 <sup>st</sup> cycle | 2 <sup>nd</sup> cycle | 3 <sup>rd</sup> cycle | 4 <sup>th</sup> cycle | 1 <sup>st</sup> cycle                  | 2 <sup>nd</sup> cycle | 3 <sup>rd</sup> cycle | 4 <sup>th</sup> cycle |
| NiA <sub>max</sub> MDC | 26.5                 | 160.32                | 212.1                 | 236.3                 | 255.2                 | 11.70                                      | 749.77                | 930.6                 | 930.6                 | 1085.4                | 128                                    | 116                   | 120                   | 117                   |

A. Air flow rate of 3 ml/min

| MDCs                   | Maximum voltage (mV)  |                       |                       |                       | Maximum power density (mW/m <sup>3</sup> ) |                       |                       |                       | Hydraulic retention time (HRT) (hours) |                       |                       |                       |
|------------------------|-----------------------|-----------------------|-----------------------|-----------------------|--------------------------------------------|-----------------------|-----------------------|-----------------------|----------------------------------------|-----------------------|-----------------------|-----------------------|
|                        | 5 <sup>th</sup> cycle | 6 <sup>th</sup> cycle | 7 <sup>th</sup> cycle | 8 <sup>th</sup> cycle | 5 <sup>th</sup> cycle                      | 6 <sup>th</sup> cycle | 7 <sup>th</sup> cycle | 8 <sup>th</sup> cycle | 5 <sup>th</sup> cycle                  | 6 <sup>th</sup> cycle | 7 <sup>th</sup> cycle | 8 <sup>th</sup> cycle |
| NiA <sub>max</sub> MDC | 243.9                 | 240.7                 | 238.9                 | 242.7                 | 991.4                                      | 965.6                 | 951.2                 | 981.7                 | 100                                    | 112                   | 80                    | 98                    |

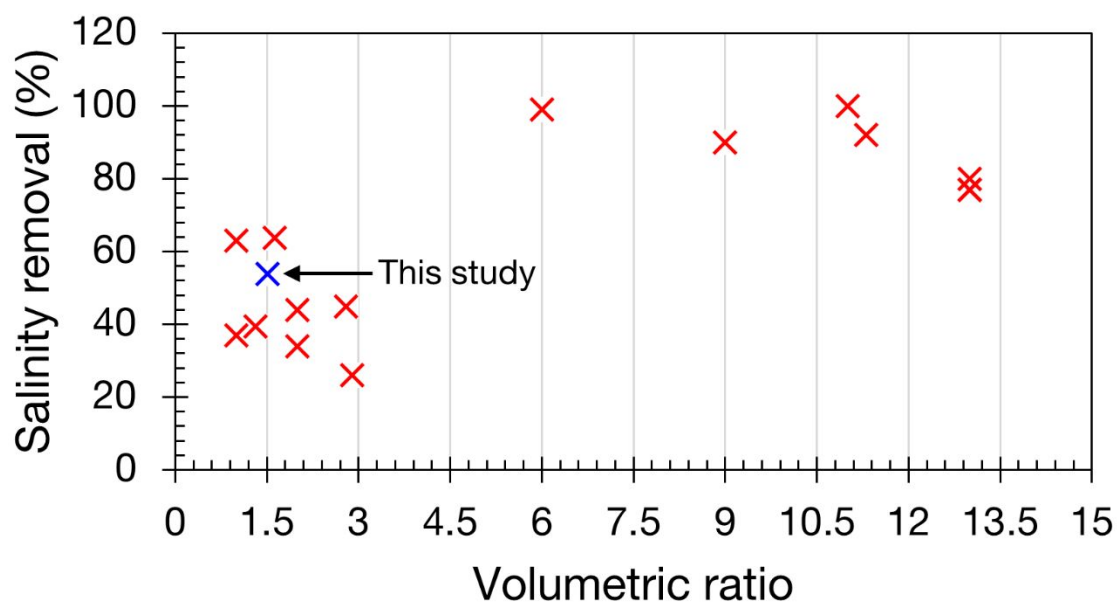

**Figure S3.** Effect of volumetric ratio (volume of anode to volume of desalination) in the salinity removal.<sup>1-7</sup>

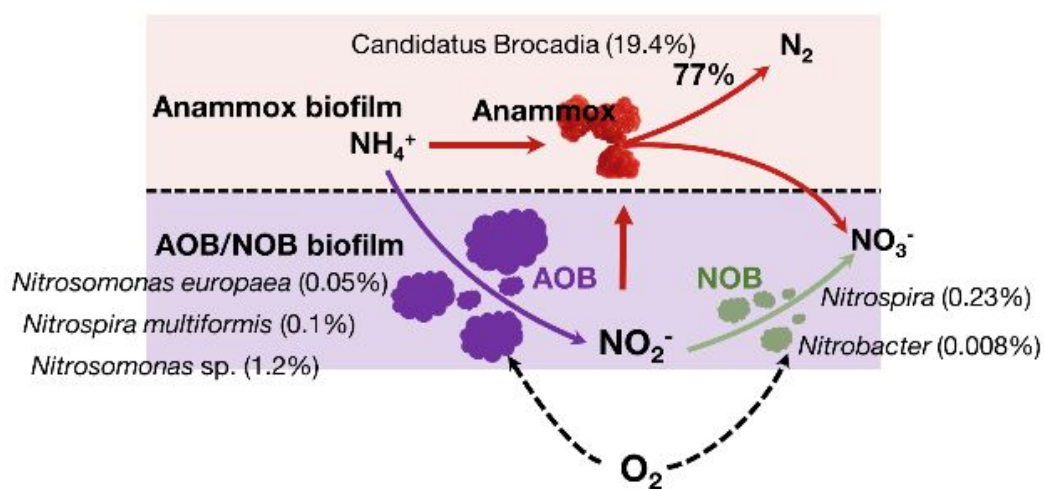

**Figure S4.** One stage nitrification anammox mechanism in bioelectrochemical biofilm with relative abundance of anammox, AOBs and NOBs.

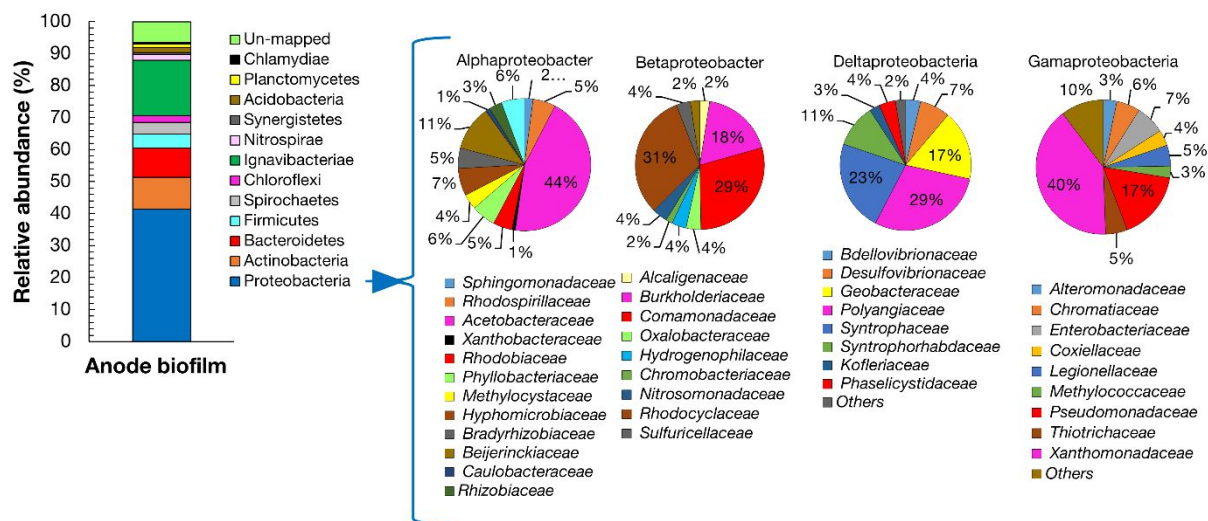

**Figure S5.** The relative abundance of the microbial community of anode biofilm at the phylum level and family level for proteobacteria phylum.

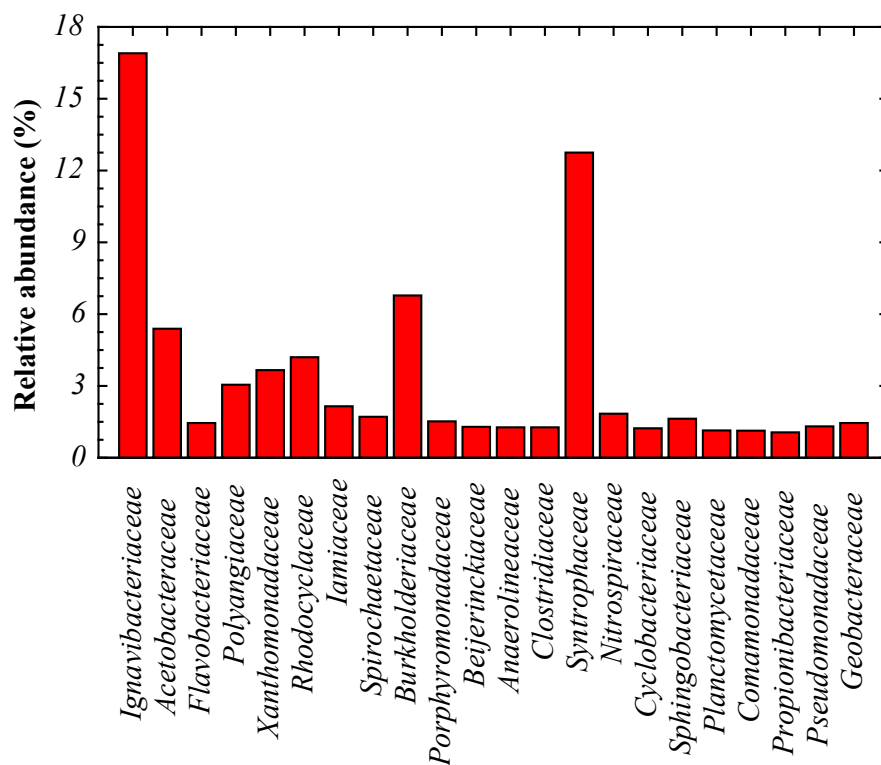

**Figure S6.** The relative abundance of the microbial community of anode biofilm at the family level.

## Energy production calculation

The voltage (V) produced by the NiA<sub>max</sub>MDC was recorded by using Fluke (287 true RMS) multimeter. The voltage was dropped across 1000  $\Omega$  load resistor (R) in every 15 minutes of interval. This gives us the value of current flowing through the system in every 15 minutes. The energy produced by MDC was calculated using eq S1.

$$\begin{aligned}\text{Energy produced by MDC} &= \int_0^t i(A)v(V)dt = 8.70 \text{ watt-sec} & (S1) \\ &= 8.70 \times (3600 \times 1000) \text{ kWh} \\ &= 2.41 \times 10^{-6} \text{ kWh} \\ &= (2.41 \times 10^{-6} \text{ kWh}) / (60 \text{ ml} \times 10^{-6}) \text{ (anode volume 60 ml)} \\ &= 0.040 \text{ kWh/m}^3\end{aligned}$$

## References

- (1) Kokabian, B.; Gude, V. G.; Smith, R.; Brooks, J. P. Evaluation of Anammox Biocathode in Microbial Desalination and Wastewater Treatment. *Chem. Eng. J.* **2018**, *342*, 410–419.
- (2) Li, Y.; Styczynski, J.; Huang, Y.; Xu, Z.; McCutcheon, J.; Li, B. Energy-Positive Wastewater Treatment and Desalination in an Integrated Microbial Desalination Cell (MDC)-Microbial Electrolysis Cell (MEC). *J. Power Sources* **2017**, *356*, 529–538.
- (3) Meng, F.; Jiang, J.; Zhao, Q.; Wang, K.; Zhang, G.; Fan, Q.; Wei, L.; Ding, J.; Zheng, Z. Bioelectrochemical Desalination and Electricity Generation in Microbial Desalination Cell with Dewatered Sludge as Fuel. *Bioresour. Technol.* **2014**, *157*, 120–126.
- (4) Davis, R. J.; Kim, Y.; Logan, B. E. Increasing Desalination by Mitigating Anolyte PH Imbalance Using Catholyte Effluent Addition in a Multi-Anode Bench Scale Microbial Desalination Cell. *ACS Sustain. Chem. Eng.* **2013**, *1* (9), 1200–1206.
- (5) Cao, X.; Huang, X.; Liang, P.; Xiao, K.; Zhou, Y.; Zhang, X.; Logan, B. E. A New Method for Water Desalination Using Microbial Desalination Cells. *Environ. Sci. Technol.* **2009**, *43* (18), 7148–7152.
- (6) Jacobson, K. S.; Drew, D. M.; He, Z. Use of a Liter-Scale Microbial Desalination Cell as a Platform to Study Bioelectrochemical Desalination with Salt Solution or Artificial Seawater. *Environ. Sci. Technol.* **2011**, *45* (10), 4652–4657.
- (7) Mehanna, M.; Saito, T.; Yan, J.; Hickner, M.; Cao, X.; Huang, X.; Logan, B. E. Using Microbial Desalination Cells to Reduce Water Salinity Prior to Reverse Osmosis. *Energy Environ. Sci.* **2010**, *3* (8), 1114–1120.
